# Supplementary material for: Hypertensive Disorders in Pregnancy Are Associated With Congenital Heart Defects in Offspring: A Systematic Review and Meta-Analysis
Source: PubMed Central journal article supplement (PMC8995565; doi:10.3389/fcvm.2022.842878), 2022-03-28
Supplement: Data_Sheet_1.pdf [file Data_Sheet_1.pdf]

## *Supplementary Material*

**Supplemental Table 1. Search Strategy for Each Electronic Database**

|    |                                                                                                     |
|----|-----------------------------------------------------------------------------------------------------|
| 1  | hypertensive disorders in pregnancy                                                                 |
| 2  | gestational hypertension                                                                            |
| 3  | pregnancy hypertension                                                                              |
| 4  | pregnancy-induced hypertension                                                                      |
| 5  | pregnancy induced hypertension                                                                      |
| 6  | preeclampsia                                                                                        |
| 7  | pre-eclampsia                                                                                       |
| 8  | eclampsia                                                                                           |
| 9  | chronic hypertension complicated with pre-eclampsia                                                 |
| 10 | chronic hypertension                                                                                |
| 11 | preeclampsia superimposed on preexisting hypertension                                               |
| 12 | hypertension                                                                                        |
| 13 | # 1 or # 2 or # 3 or # 4 or # 5 or # 6 or # 7 or # 8 or # 9 or # 10 or # 11 or # 12                 |
| 14 | congenital heart disease                                                                            |
| 15 | congenital heart defect                                                                             |
| 16 | congenital heart malformation                                                                       |
| 17 | congenital heart anomalies                                                                          |
| 18 | congenital cardiac disease                                                                          |
| 19 | congenital cardiac defect                                                                           |
| 20 | congenital cardiac malformation                                                                     |
| 21 | congenital cardiac anomalies                                                                        |
| 22 | cardiovascular malformation                                                                         |
| 23 | congenital cardiovascular disease                                                                   |
| 24 | cardiovascular defect                                                                               |
| 25 | cardiovascular anomalies                                                                            |
| 26 | # 14 or # 15 or # 16 or # 17 or # 18 or # 19 or # 20 or # 21 or # 22 or # 23 or # 24 or # 25 or #26 |
| 27 | case-control study                                                                                  |
| 28 | cohort study                                                                                        |
| 29 | prospective study                                                                                   |
| 30 | longitudinal study                                                                                  |
| 31 | follow-up study                                                                                     |
| 32 | # 27 or # 28 or # 29 or # 30 or # 31                                                                |
| 33 | #13 and #26 and #32                                                                                 |

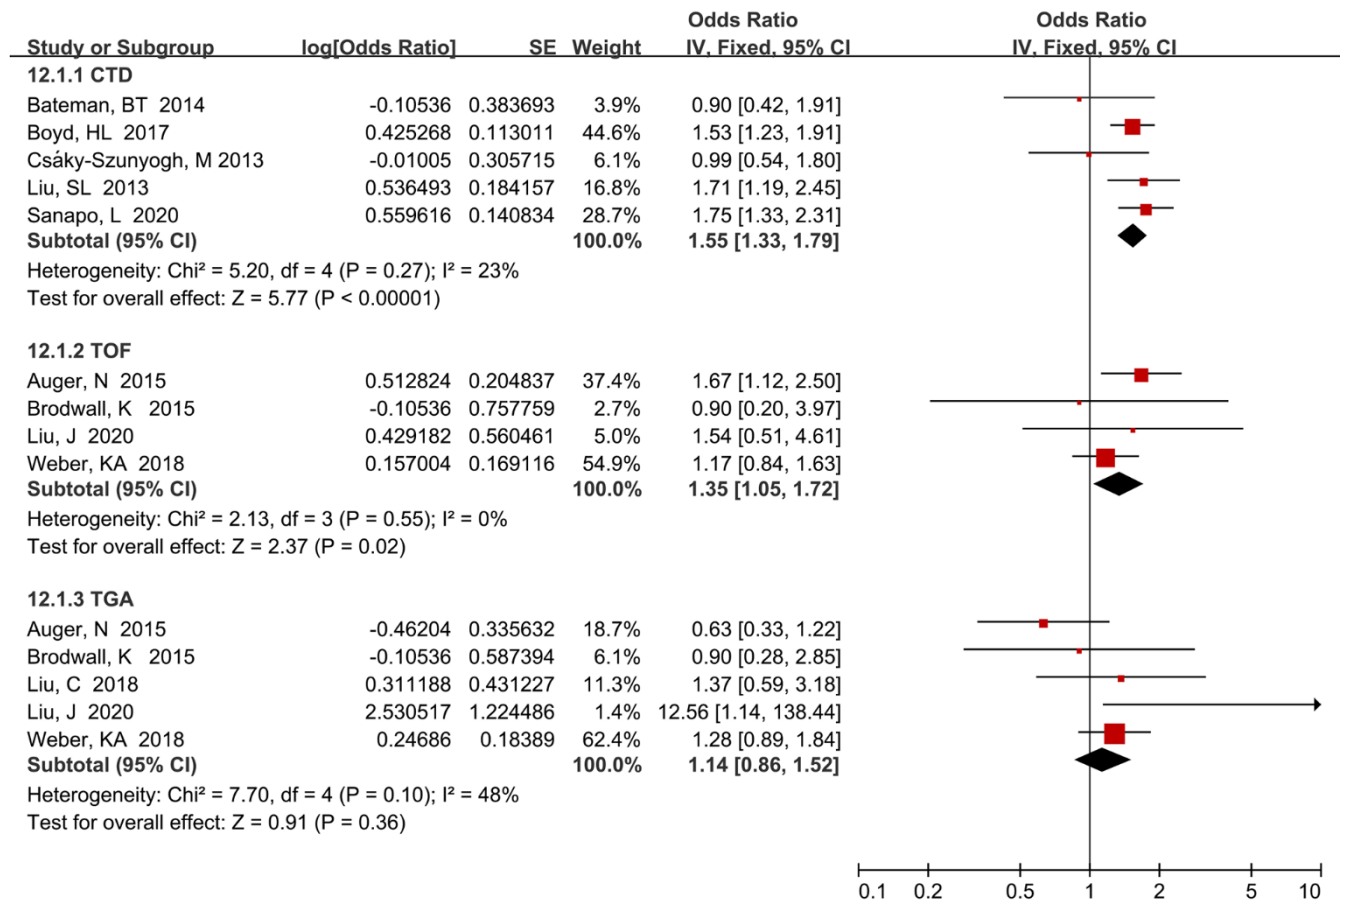

Supplemental Figure 1. Forest plot of maternal HDP exposure and risk of CTD, TOF, and TGA in offspring

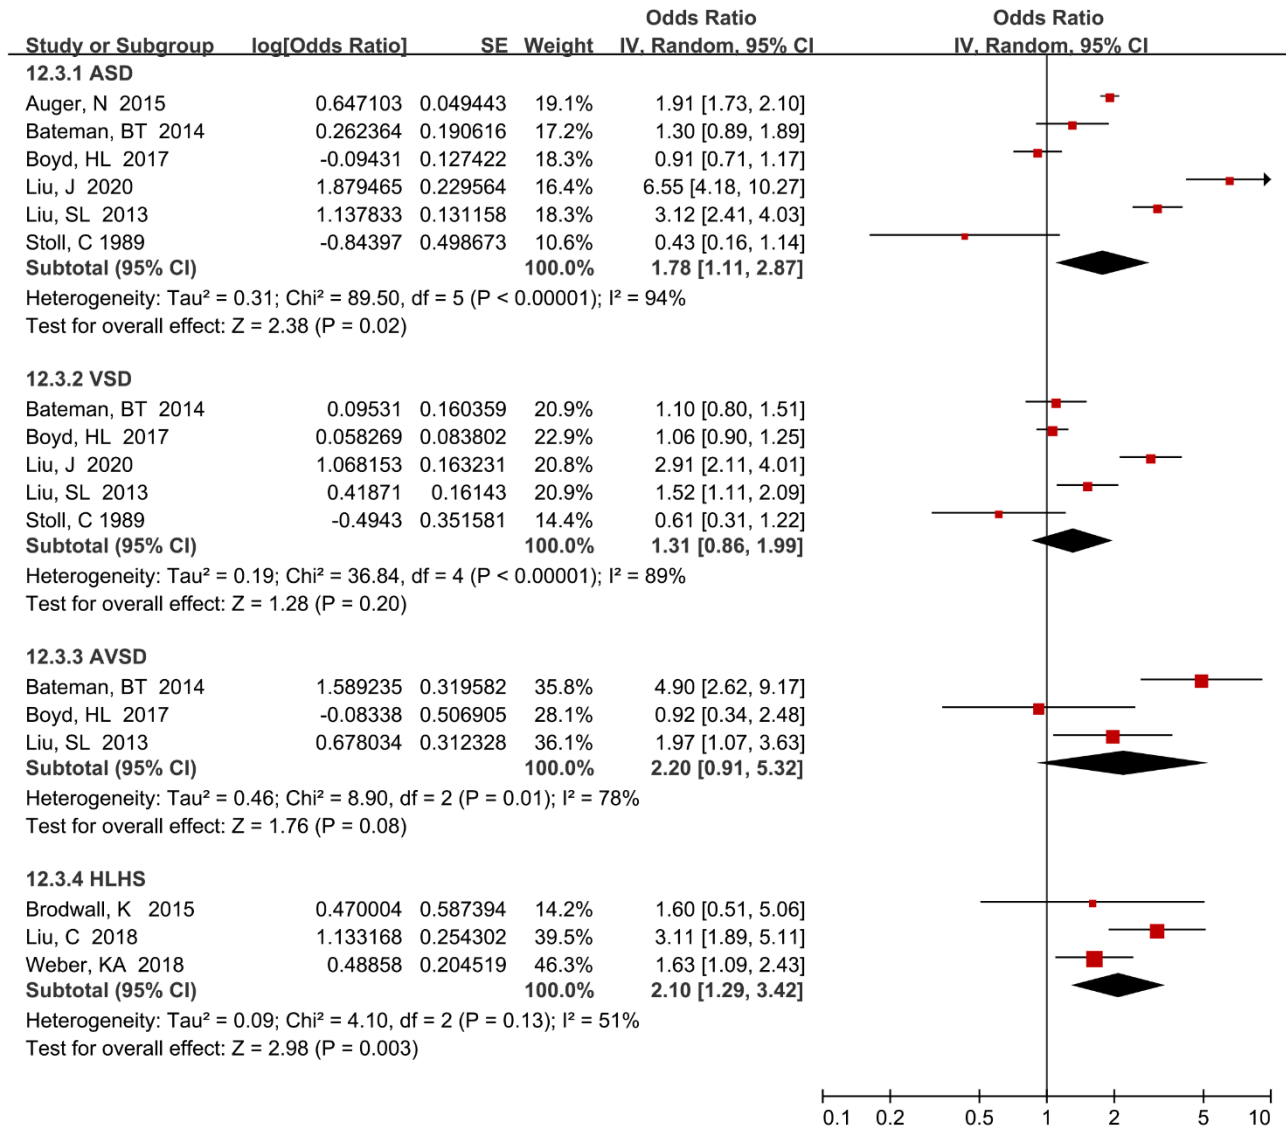

Supplemental Figure 2. Forest plot of maternal HDP exposure and risk of ASD, VSD, AVSD, and HLHS in offspring

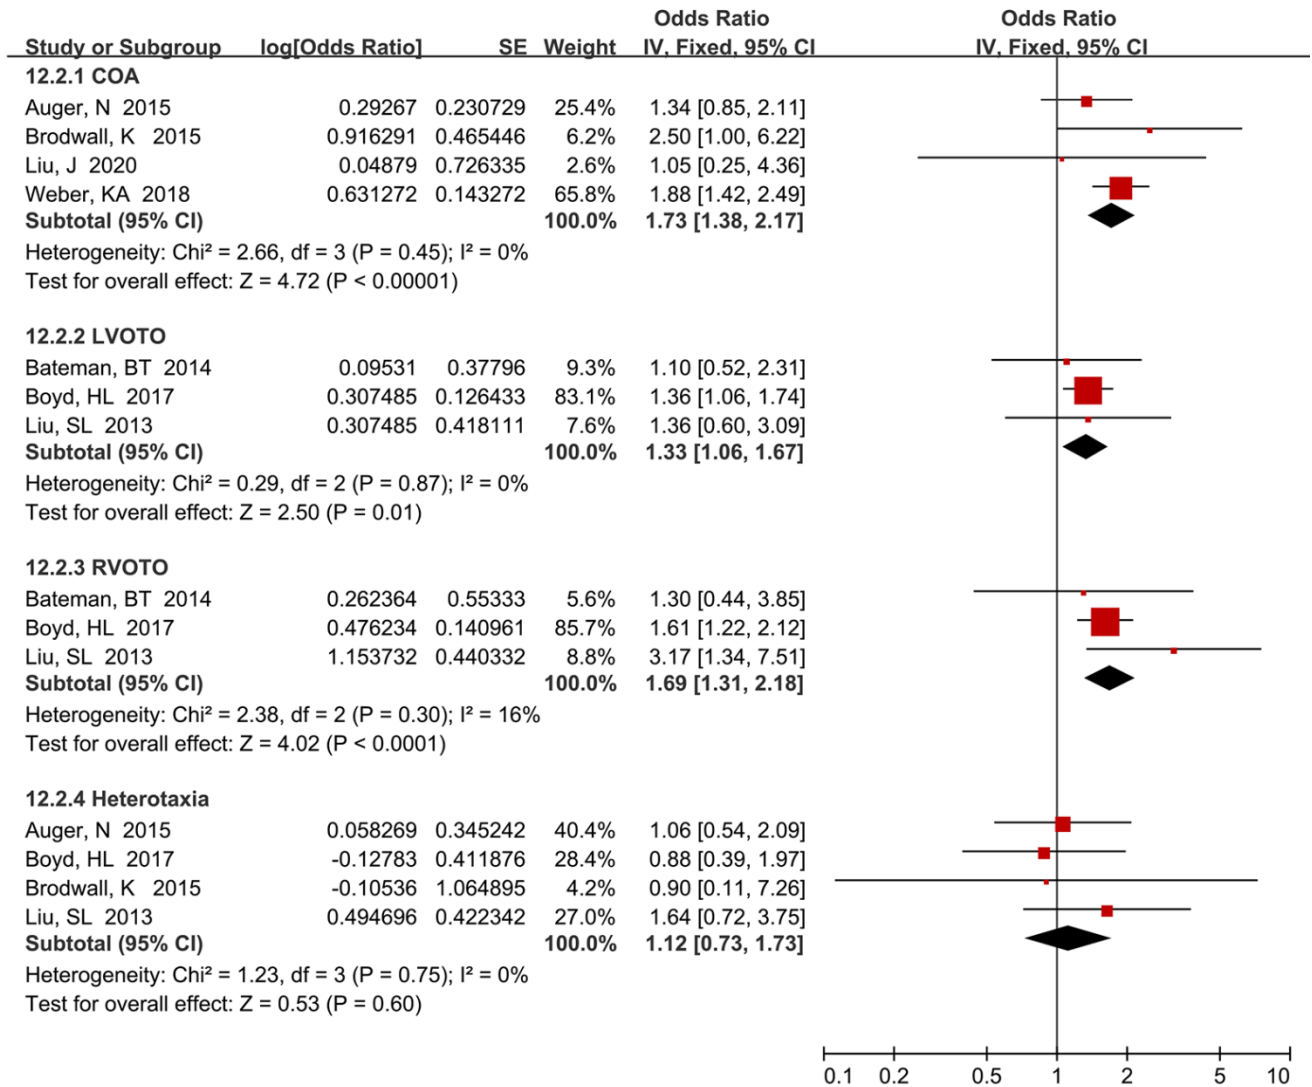

Supplemental Figure 3. Forest plot of maternal HDP exposure and risk of COA, LVOTO, RVOTO, and Heterotaxia in offspring

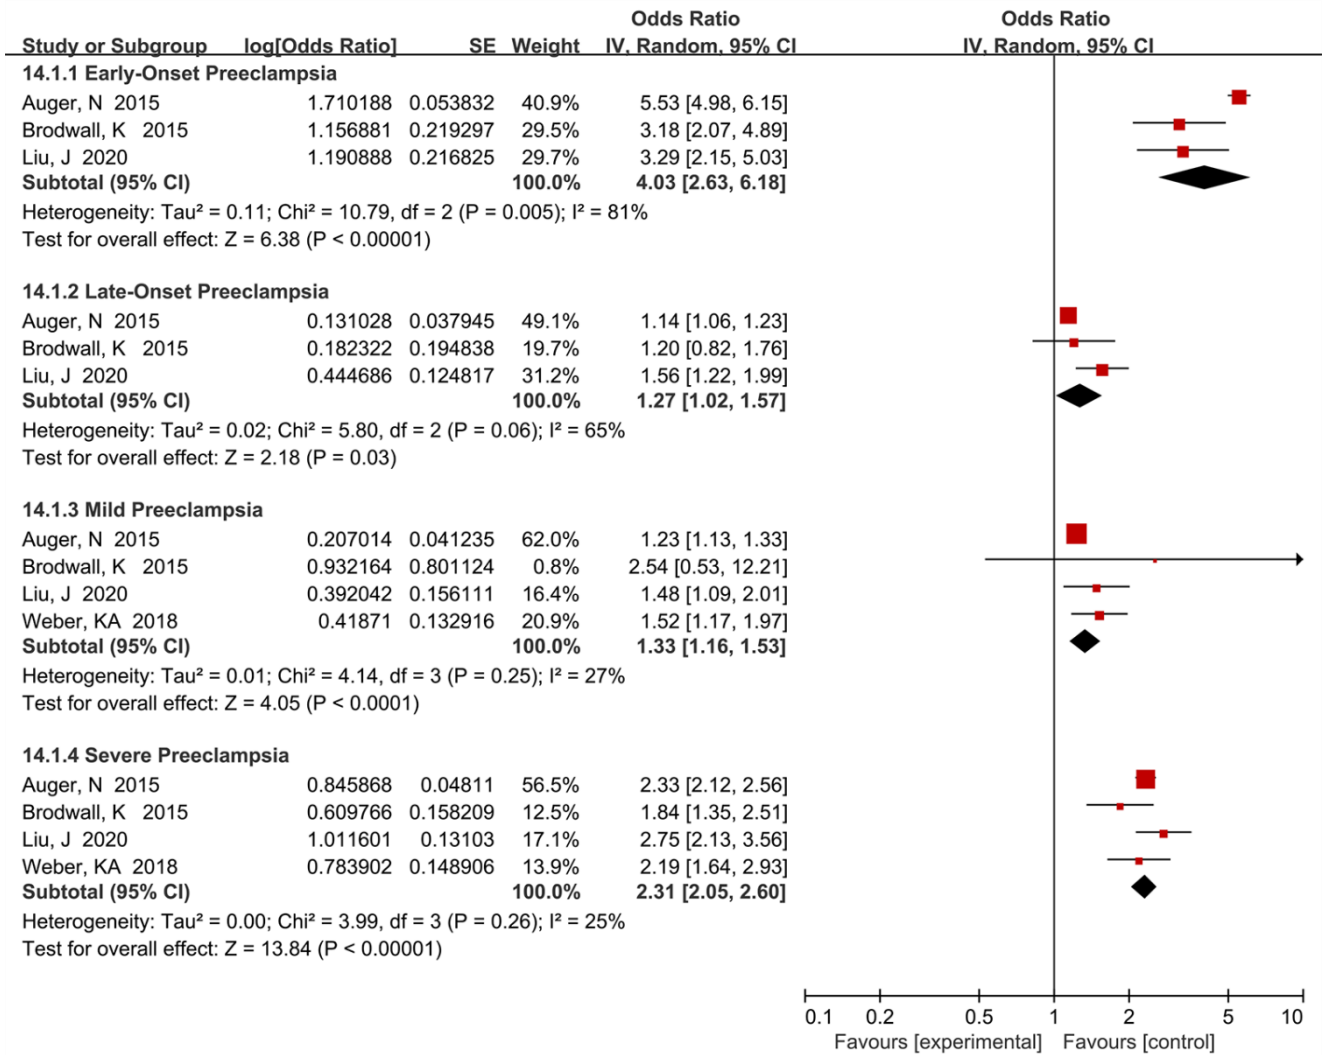

Supplemental Figure 4. Forest plot of specific preeclampsia types and the risk of total CHDs in offspring
